# Supplementary material for: Hydrogen liberation from the hydrolytic dehydrogenation of dimethylamine–borane at room temperature by using a novel ruthenium nanocatalyst
Source: Royal Society of Chemistry journal article supplement (doi:10.1039/c2dt00042c), 2012-01-01
Supplement: c2dt00042c.pdf [file c2dt00042c.pdf]

# Supporting Information

## Hydrogen liberation from the hydrolytic dehydrogenation of dimethylamine-borane at room temperature by using a novel ruthenium nanocatalyst †

Salim Çalışkan,<sup>a</sup> Mehmet Zahmakıran,<sup>\*,b</sup> Feyyaz Durap,<sup>c</sup> Saim Özkar<sup>a</sup>

<sup>a</sup>Department of Chemistry, Middle East Technical University, 06800 Ankara, Turkey,

<sup>b</sup>Department of Chemistry, Yüzüncü Yıl University, 65080 Van, Turkey,

<sup>c</sup>Department of Chemistry, Dicle University, 21280, Diyarbakır, Turkey

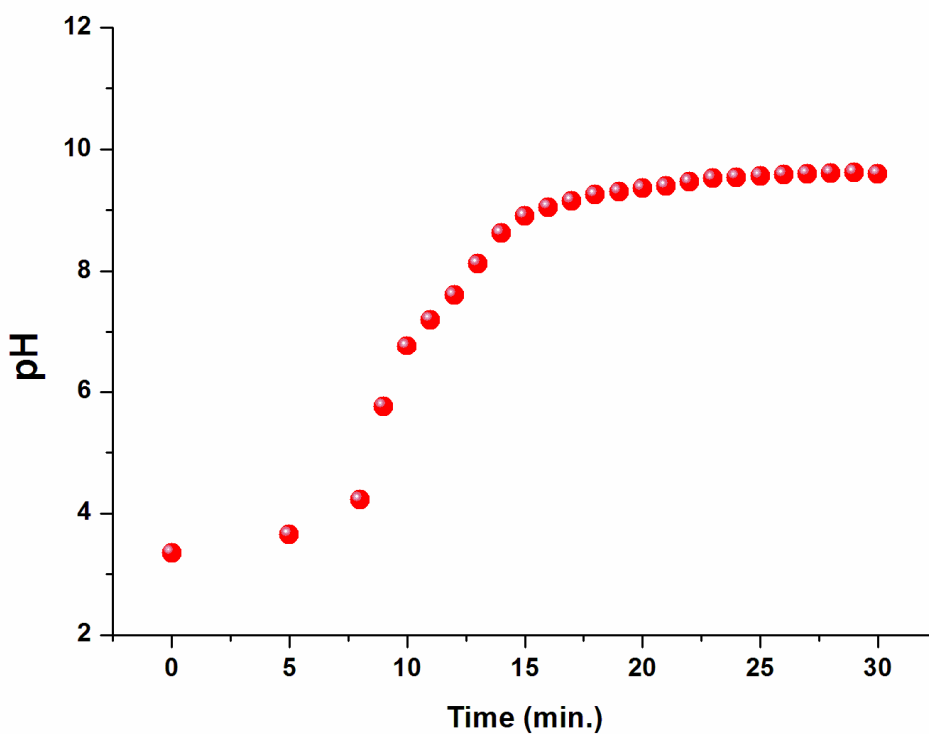

**Fig. ESI-1.** Plot of volume of hydrogen (mL) generated versus time (min) for the *in-situ* generated ruthenium(0) nanoparticles catalyzed hydrolytic dehydrogenation of dimethylamine-borane starting with 1.0 mM  $\text{RuCl}_3 \cdot 3\text{H}_2\text{O}$  precatalyst, 20 mM  $[(\text{C}_4\text{H}_9)_4\text{N}](\text{H}_2\text{PO}_4)$  and 100 mM  $(\text{CH}_3)_2\text{NHBH}_3$  at  $25 \pm 0.1^\circ\text{C}$

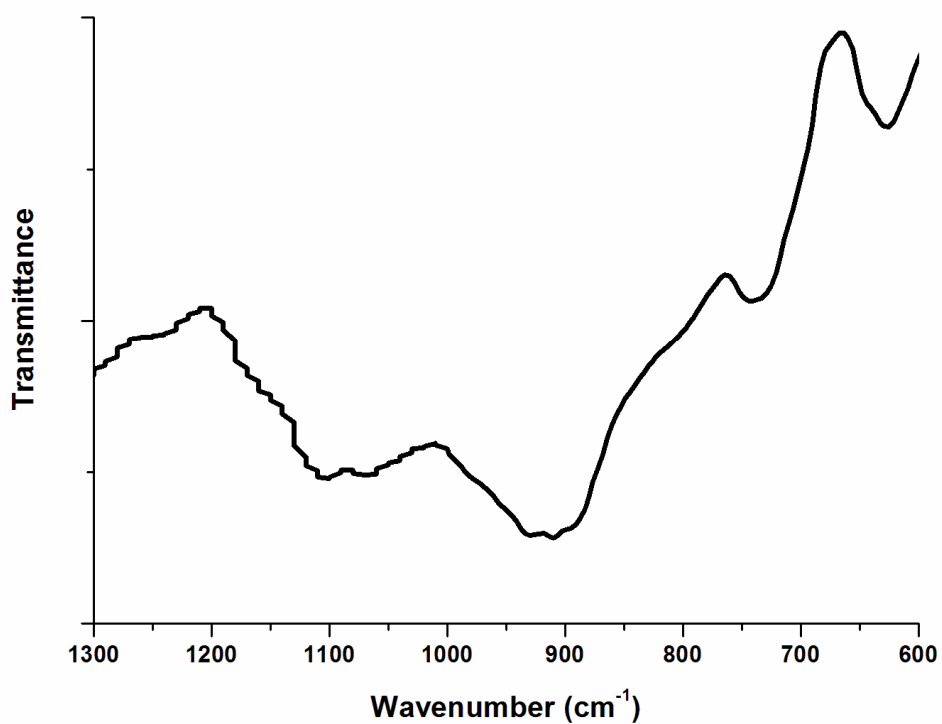

**Fig. ESI-2.** ATR-IR spectrum of the bulk ruthenium isolated at the end of the hydrolytic dehydrogenation of dimethylamine-borane.

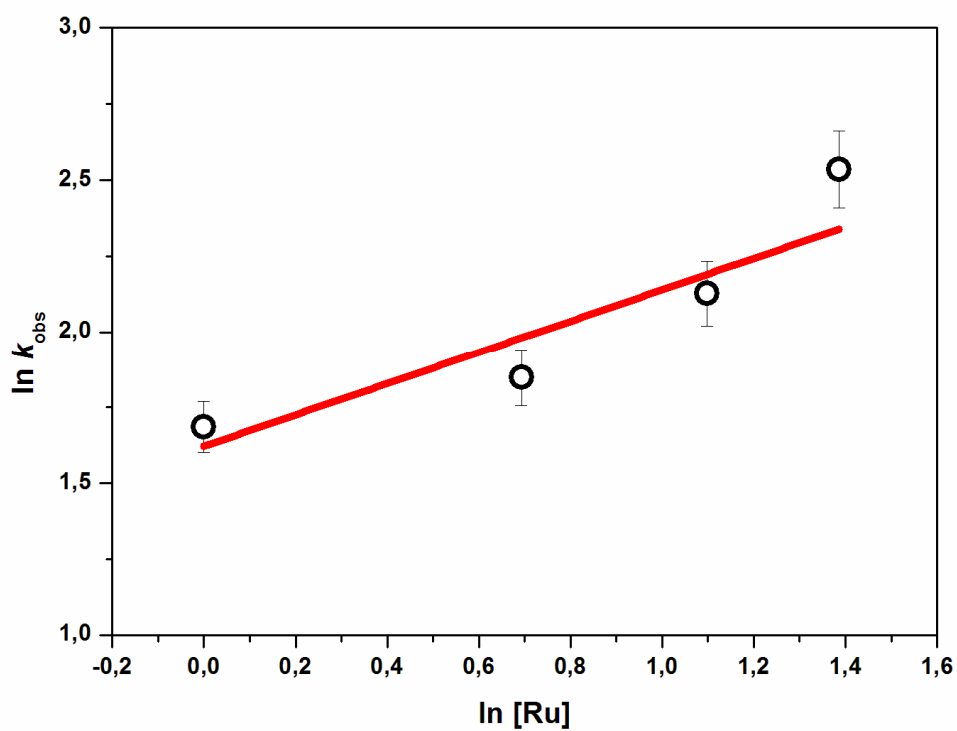

**Fig. ESI-3.**  $\ln k_{obs}$  vs  $\ln[Ru]$  plot for the *in-situ* generated RuNPs catalyzed hydrolytic dehydrogenation of dimethylamine-borane.

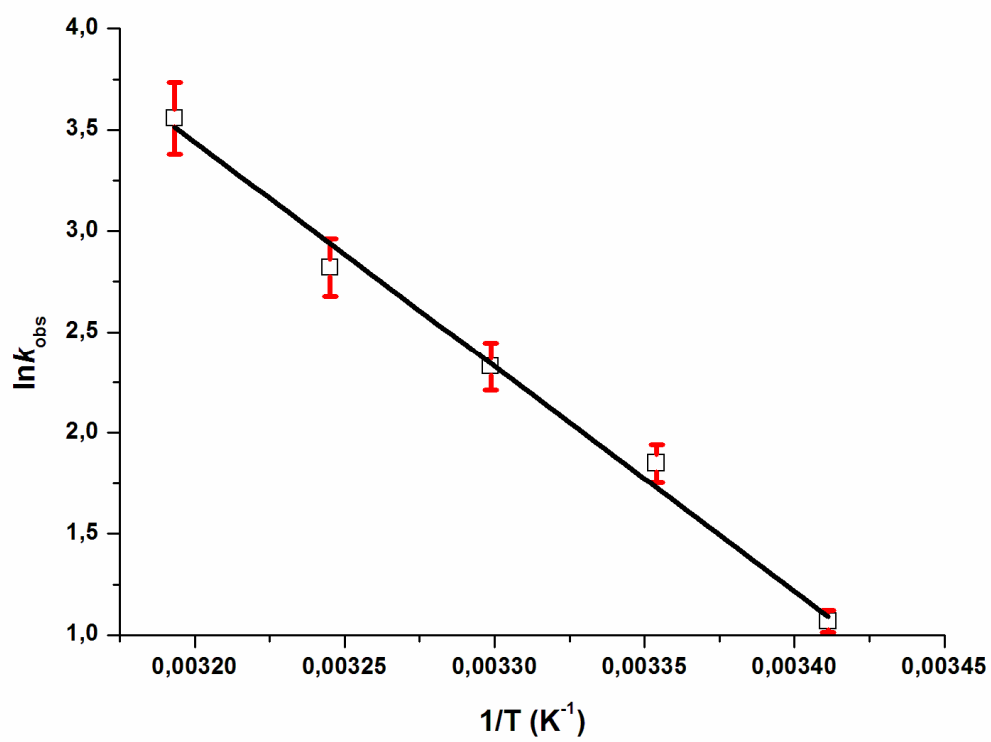

**Fig. ESI-4.**  $\ln k_{\text{obs}}$  vs  $1/T$  plot for the *in-situ* generated RuNPs catalyzed hydrolytic dehydrogenation of dimethylamine-borane.

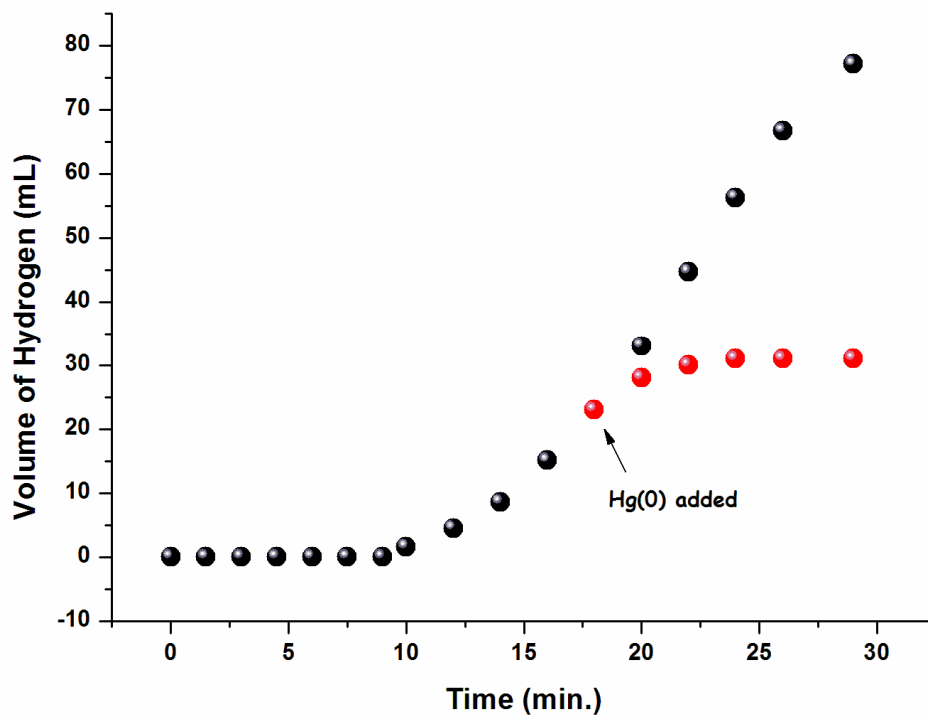

**Fig. ESI-5.** Hg(0) poisoning experiment for the *in-situ* generated RuNPs catalyzed hydrolytic dehydrogenation of dimethylamine-borane.
